1 **SARS-CoV-2: Proof of recombination between strains and emergence of**  
2 **possibly more virulent ones.**

3 Dania Haddad<sup>1</sup>, Sumi Elsa John<sup>1</sup>, Anwar Mohammad<sup>2</sup>, Maha M Hammad<sup>2</sup>, Prashantha Hebbar<sup>1</sup>, Arshad  
4 Channanath<sup>1</sup>, Rasheeba Nizam<sup>1</sup>, Sarah Al-Qabandi<sup>3</sup>, Ashraf Al Madhoun<sup>1</sup>, Abdullah Alshukry<sup>4</sup>, Hamad  
5 Ali<sup>1,5</sup>, Thangavel Alphonse Thanaraj<sup>1\*</sup>, Fahd Al-Mulla<sup>1\*</sup>.

6 <sup>1</sup>Department of Genetics and Bioinformatics, Dasman Diabetes Institute, Kuwait

7 <sup>2</sup>Department of Biochemistry and Molecular Biology, Dasman Diabetes Institute, Kuwait

8 <sup>3</sup>Public Health Laboratory, Ministry of Health, Kuwait

9 <sup>4</sup>Department of Otolaryngology & Head and Neck Surgery, Jaber Al-Ahmad Hospital, Ministry of  
10 Health, Kuwait

11 <sup>5</sup>Department of Medical Laboratory Sciences, Faculty of Allied Health Sciences, Health Sciences Center,  
12 Kuwait University, Kuwait

13 \* Author to whom correspondence should be addressed.

14

15 Corresponding authors:

16 Fahd Al-Mulla

17 P.O. Box 1180, Dasman 15462, Kuwait

18 [fahd.almulla@dasmaninstitute.org](mailto:fahd.almulla@dasmaninstitute.org)

19

20 Alphonse T. Thangavel

21 P.O. Box 1180, Dasman 15462, Kuwait

22 [alphonse.thangavel@dasmaninstitute.org](mailto:alphonse.thangavel@dasmaninstitute.org)

## 23 **Abstract**

24 COVID-19 is challenging healthcare preparedness, world economies, and livelihoods. The infection and  
25 death rates associated with this pandemic are strikingly variable in different countries. To elucidate this  
26 discrepancy, we analyzed 2431 early spread SARS-CoV-2 sequences from GISAID. We estimated  
27 continental-wise admixture proportions, assessed haplotype block estimation, and tested for the presence  
28 or absence of strains recombination. Herein, we identified 1010 unique missense mutations and seven  
29 different SARS-CoV-2 clusters. In samples from Asia, a small haplotype block was identified; whereas,  
30 samples from Europe and North America harbored large and different haplotype blocks with  
31 nonsynonymous variants. Variant frequency and linkage disequilibrium varied among continents,  
32 especially in North America. Recombination between different strains was only observed in North  
33 American and European sequences. Additionally, we structurally modeled the two most common mutations  
34 D614G and P314L which suggested that these linked mutations may enhance viral entry and stability.  
35 Overall, we propose that COVID-19 virulence may be more severe in Europe and North America due to  
36 coinfection with different SARS-CoV-2 strains leading to genomic recombination which might be  
37 challenging for current treatment regimens and vaccine development. Furthermore, our study provides a  
38 possible explanation for the more severe second wave of COVID-19 that many countries are currently  
39 experiencing presented as higher rates of infection and death.

## 40 **Introduction**

41 The recent severe acute respiratory syndrome coronavirus-2 (SARS-CoV-2) outbreaks have grievously  
42 impacted the world by threatening lives and impeding human activity in a short period. Understanding the  
43 factors that govern the severity of a pandemic is of paramount importance to design better surveillance  
44 systems and control policies [1]. In the case of COVID-19, three variables play a critical role in its spread  
45 and severity in a country: the nature of the pathogen, genetic diversity of the host population, and  
46 environmental factors such as public awareness and health measures provided by governments [2].

47 SARS-CoV-2 spike (S) glycoprotein plays an integral role in the viral transmission virulence [3]. The S  
48 protein contains two functional subunits S1 and S2 cleaved by FURIN protease at the host cell [4]. The S1  
49 subunit contains the receptor binding domain and facilitates interactions with the host cell surface receptor,  
50 Angiotensin-converting enzyme 2 (ACE2) [5,6]. The S2 subunit, activated by the host Transmembrane  
51 Serine Protease 2, harbors necessary elements for membrane fusion [7]. S protein mutations may induce  
52 conformational changes leading to increased pathogenicity [8]. We were pioneers to report the perspective  
53 role of S protein D614G (23403A>G) variant located at the S1-S2 proximal junction. The D614G mutation  
54 generates conformational changes in the protein structure which renders the FURIN cleavage site (664-  
55 RRAR-667) flexible and thus enhances viral entry [9]. Currently, the D614G mutation has become the  
56 focus of several recent studies for the use in prospective drug targeting strategies [10]. Furthermore, studies  
57 on understanding the genetic diversity and evolution of SARS-CoV-2 are emerging [11] . Admixture  
58 analyses have been conducted to understand the evolution of Beta-coronaviruses and in particular the  
59 diversification of SARS-CoV-2 [12]. Haplotype analysis have also indicated that frequencies of certain  
60 haplotypes correlate with virus pathogenicity [13].

61 Here we extended our study by analyzing the population genetics aspects within genome sequences of  
62 SARS-CoV-2 to understand the contiguous spread of SARS-CoV-2, its rapid evolution, and the differential  
63 severity of COVID-19 among different continents. We analyzed 2341 viral sequences deposited in GISAID

64 including those sequenced in our lab from patients in Kuwait. We found evidence of coinfection between  
65 different viral strains in Europe and in North America but not in the other continents. We also modelled  
66 major mutations and their possible effect on the stability of the encoded protein and hence on SARS-CoV-  
67 2 virulence.

## 68 **Methods**

### 69 **Retrieval of complete SARS-CoV-2 genome sequences**

70 2431 complete SARS-CoV-2 genome sequences from infected individuals were retrieved from the GISAID  
71 database (Global Initiative on Sharing All Influenza Data) [14] (accessed on April 3<sup>rd</sup>, 2020) and were used  
72 for all analyses.

### 73 **Alignment and annotation of amino acid sequence variation**

74 Multiple sequence alignment was performed using MAFFT v7.407 [15] (retree: 5 , maxiter: 1000).  
75 Alignments' gaps were trimmed using TrimAL (automated1) [16]. SeqKit [17] was used to concatenate  
76 chopped-off missing sequences using NC045512.2 as a reference. SNP-sites [18] and Annovar [19] were  
77 used to extract and annotate single nucleotide variants (SNV).

### 78 **Linkage disequilibrium and haplotype blocks analysis**

79 PLINK2 [20] was used to extract sequence variants with minor allele frequencies (MAF)  $\geq 0.5\%$ , to  
80 estimate inter-chromosomal Linkage disequilibrium (LD), squared correlation coefficient ( $r^2$ ), and  
81 haplotype blocks. We used Haploview [21] to visualize the haplotype blocks.

82 To detect recombination within datasets, we tested for pairwise homoplasmy index using PhiPack software  
83 [22]. Admixture 1.3.0 software [23] was used to identify genetic substructure of variants' continental  
84 transmission as follows: variants with MAF  $\geq 0.5\%$ , variants in LD ( $R^2 > 0.5$ ), haplotype blocks, variants  
85 not in LD, nonsynonymous, and synonymous variants. All analyses were iterated for K=10 and cross  
86 validation errors were examined to infer an optimal K cluster. Replicate runs were further processed using

87 CLUMPAK [24] and results for the major modes were illustrated using R software's ggplot2 package  
88 (<https://www.r-project.org/>).

## 89 **Protein Structural Analysis**

90 The crystal structures of the viral RNA-dependent RNA polymerase (RdRp, PDB ID: 6M71) [25] and the  
91 S protein (PDB ID:6VSB) [26] were used as model proteins for the structural analysis. The missing aa,  
92 invisible by Cryo-EM structure of the S-protein, were modeled-in by using SWISS-Model [27]. DynaMut  
93 web server [28] was used to predict the effect of the mutations on the proteins stability and flexibility.  
94 PyMol (Molecular Graphics System, Version 2.0, Schrodinger, LLC) was used to generate structural  
95 images.

## 96 **Results**

### 97 **Detection and classification of mutations from global SARS-CoV-2 genome sequences**

98 We analyzed 2431 high quality SARS-CoV-2 genome sequences from six continental groups. In  
99 comparison to the Wuhan reference sequence (NC045512.2), 2352 sequences showed substantial genetic  
100 differences. We identified 1010 unique missense amino acid (aa) mutations using our variant calling  
101 pipeline. 613 variants were nonsynonymous, 387 variants were synonymous, 3 variants were stop-gain, and  
102 1 variant was a 5'-utr variant. We found only 72 variants at  $MAF \geq 0.5\%$  which were for admixture and  
103 haplotype block analysis. **Fig 1** shows the distribution of synonymous and nonsynonymous variants in each  
104 gene in SARS-CoV-2 genome with varying MAF thresholds. The genes with the highest percentage of  
105 nonsynonymous variants with  $MAF \geq 0.05$  are ORF3a, M, and ORF8 while the genes with the highest  
106 percentage of synonymous variants with  $MAF \geq 0.05$  are ORF6 and ORF10.

### 107 **Identification of SARS-CoV-2 genetic clusters in different continents**

108 We performed Principal Component Analysis (PCA) of 2352 SARS-CoV-2 sequences as indicated in **Fig**  
109 **2**. The PCA analysis gave three distinct clusters of samples based on their continent of origin. All three

110 clusters diverge from a single point (**Fig 2**, red circle). The North American cluster showed the least viral  
111 genetic variances; unlike, samples from Asia and Oceania which harbored the most genetic diversity.  
112 Whereas the European cluster is well defined with few interspersed Asian samples which is an indication  
113 of its origin. This clustering in Europe and North America is probably associated with a founder effect  
114 where a single mutation was introduced and subsequently transmitted. This suggestion is corroborated by  
115 the fact that the collection date of the founder strain is prior to that observed in the European and the North  
116 American clusters (S1 Fig).

117 Then, in order to estimate the ancestral allele frequencies and admixture proportions for each SARS-CoV-  
118 2 sample, admixture analysis was implemented. We used cross validation (CV) procedure to find best (i.e.,  
119 minimal error) K for a range of iterations in RAW (comprised 1010 SNVs). S2 Fig presents the trend of  
120 CV error in RAW (A) and variants filtered for  $MAF \geq 0.5\%$  (B). We observed a gradual reduction in CV  
121 error for iterations up to  $K=7$  and subsequently, a pattern of an increase-decrease was observed in  
122 subsequent iterations; however, the least error was seen at  $K=17$ . Further, we verified this CV trend in a  
123 subset of variants filtered for  $MAF \geq 0.5\%$  (comprised of 72 SNVs). Interestingly, we again observed a  
124 gradual reduction of CV error up to  $K=7$  (with best fit at 7) and subsequently, a trend of increasing CV  
125 error.

126 We created subsets of strong LD, weak LD, Haplotype block, nonsynonymous, and synonymous variants  
127 from 72 variants at  $K=7$  across the continents. We separately performed admixture analysis on these  
128 subsets. The analysis of the detected seven datasets revealed interesting mosaic patterns (**Fig 3 A and B**).  
129 Samples from Asia formed largely two clusters (C1-dominant, and C6); whereas, the samples from Europe  
130 dataset distributed into six different clusters (C1, C2-dominant, C3, C5, C6 and C7); and the North  
131 American samples formed four clusters (C1, C2, C4-dominant and C7). Similarly, African and Oceanian  
132 datasets formed two clusters each (C2, C3; with dominant C2 and C3, C5; with dominant C3 respectively)  
133 and South American dataset is mostly formed by five clusters (C1, C2, C3, C5 and C6).

134 In the context of LD (**Fig 3 C and D**), the strong LD block is mostly observed in two clusters (C1 and C6)  
135 and the weak LD block is observed in three clusters (C1, C3, and C7) in Asia. In Europe, the strong LD  
136 block is observed in 4 clusters (C1, C2, C3, and C5) and the weak LD block is observed in five clusters  
137 (C1,C2,C3,C4, and C5; predominantly from C3 and C5). Interestingly, four clusters are common between  
138 the strong and weak LD blocks, suggesting that a makeup of four strains that dominate in Europe have  
139 significant proportion of strong and weak LD signatures in them. Likewise, in North America, both strong  
140 and weak LD are observed among three clusters (C1, C2, and C4) and (C1, C3, and C4) respectively.  
141 Further in Africa, Oceania and South America, strong LD is observed among (C2), (C1) and (C1 and C2)  
142 respectively; weak LD is observed in (C3 and C4), (C1, C2, C3, and C5), (C3 and C5) respectively.  
143 Interestingly, proportions of a Haplotype block (**Fig 3 E**) identified using whole data, mostly followed  
144 pattern of strong LD of respective continents, however admixed with a weak LD strain of respective  
145 continents.

146 Most importantly variation in proportions of strains carrying nonsynonymous and synonymous signatures  
147 are also very evident as shown in **Fig 3 F and G**. Proportions of two nonsynonymous clusters (C1 and C5;  
148 both also have admixed with each other) and two synonymous clusters are dominated in Asia. Four clusters  
149 of nonsynonymous (C2, C4, C5, and C6) and five clusters of synonymous are dominating in Europe, while  
150 in North America, three nonsynonymous (C1, C3, C6) and two synonymous (C1, C3) clusters are in higher  
151 proportions. Similarly; C4 and C6, C5, and C2 nonsynonymous clusters along with C1and C6, C2, and C5  
152 synonymous clusters are in high proportion in Africa, Oceania, and South America respectively.

### 153 **Evidence of co-infection in the sequences from continental datasets**

154 Here, we tested for the presence or absence of recombination among continental datasets using PhiPack  
155 software which effectively differentiates between presence or absence of recombination using three  
156 different tests “Pairwise Homoplasmy Index (Phi)” (Bruen et al. 2006), “Neighbor Similarity Score (NSS)”  
157 (Jakobsen and Easteal, 1996) and “Maximum  $\chi^2$  (MaxChi)” [29].

158 The results of these tests on the combined dataset suggested the possibility of co-infection at a global level.  
159 Among continental datasets, only European (NSS test, P-value = 0.001) and North American [NSS and Phi  
160 (normal), P-value = 0.007 and 0.042, respectively] sequences have shown evidence for the presence of  
161 recombination events; while African, Oceanic, South American, and Asian datasets have shown no  
162 recombination in early spread of SARS-CoV-2 (**Table 1**).



163 **Table 1. Evidence of recombination in the sequences from continental datasets**

| <b>Dataset</b>        | <b>Number of informative variants</b> | <b>Tests to detect evidence of recombination</b> | <b>Significance of observed Phi statistics</b> |
|-----------------------|---------------------------------------|--------------------------------------------------|------------------------------------------------|
| Africa (n=25)         | 19                                    | NSS                                              | 1                                              |
|                       |                                       | MaxChi <sup>2</sup>                              | 0.978                                          |
|                       |                                       | Phi (permutation)                                | 1                                              |
|                       |                                       | Phi (normal)                                     | 1                                              |
| Asia (n=364)          | 127                                   | NSS                                              | 0.113                                          |
|                       |                                       | MaxChi <sup>2</sup>                              | 0                                              |
|                       |                                       | Phi (permutation)                                | 0.493                                          |
|                       |                                       | Phi (normal)                                     | 0.305                                          |
| Europe (n=1132)       | 276                                   | <b>NSS</b>                                       | <b>0.001</b>                                   |
|                       |                                       | MaxChi <sup>2</sup>                              | 0.208                                          |
|                       |                                       | Phi (permutation)                                | 0.343                                          |
|                       |                                       | Phi (normal)                                     | 0.223                                          |
| North America (n=738) | 194                                   | <b>NSS</b>                                       | <b>0.007</b>                                   |
|                       |                                       | MaxChi <sup>2</sup>                              | 0.061                                          |
|                       |                                       | Phi (permutation)                                | 0.060                                          |
|                       |                                       | <b>Phi (normal)</b>                              | <b>0.042</b>                                   |
| South America (n=24)  | 24                                    | NSS                                              | 0.596                                          |
|                       |                                       | MaxChi <sup>2</sup>                              | 0.680                                          |
|                       |                                       | Phi (permutation)                                | 0.717                                          |
|                       |                                       | Phi (normal)                                     | 0.454                                          |
| Oceania (n=69)        | 50                                    | NSS                                              | 1                                              |
|                       |                                       | MaxChi <sup>2</sup>                              | 0.502                                          |
|                       |                                       | Phi (permutation)                                | 0.872                                          |
|                       |                                       | Phi (normal)                                     | 0.361                                          |
| Combined (n=2352)     | 554                                   | <b>NSS</b>                                       | <b>0.003</b>                                   |
|                       |                                       | <b>MaxChi<sup>2</sup></b>                        | <b>0.001</b>                                   |
|                       |                                       | <b>Phi (permutation)</b>                         | <b>0.008</b>                                   |
|                       |                                       | <b>Phi (normal)</b>                              | <b>0.015</b>                                   |

164 Results of NSS, MaxChi<sup>2</sup>, Phi (permutation) and Phi (normal) tests using pairwise homoplasy index test  
 165 available from PhiPack software on the combined dataset of all the 2352 samples. Significant P-values  
 166 suggest the possibility of co-infection on a global level. European (NSS test, P-value of 0.001) and North  
 167 American (NSS and Phi(normal), P-value of 0.007, 0.042 respectively) show evidence for the presence of  
 168 recombination events, while African, Oceanic, South American, and Asian datasets show no recombination  
 169 in early spread of SARS-CoV-2 in respective continents.

## 170 **Estimation of haplotype blocks in continental samples**

171 We carried out this analysis in two ways; first by comparing haplotype blocks obtained from combined  
172 dataset of variants with  $MAF \geq 0.5\%$  with each continental dataset. We did this analysis because continental  
173 datasets of Africa (n=25), Oceania (n=69), and South America (n=24) were very small to infer high  
174 confident LD blocks from respective datasets alone. Hence, we first compared LD blocks obtained from  
175 the combined dataset and then observed LD among the same variants in each continental dataset. The  
176 second way of analysis was by directly estimating haplotype blocks in each continental dataset with large  
177 sample size such as Asia, Europe, and North America.

178 From the first analysis, we observed that LD block, obtained from the combined dataset, varies among  
179 continental datasets. S3 Fig illustrates the extent of LD variation in haplotype block of combined dataset in  
180 each continental dataset. Examination of variant allele frequency at haplotype block suggested a clear  
181 variation in allele frequency between continental datasets. **Table 2** shows MAF of 18 variants involved in  
182 haplotype block of combined dataset in each continental dataset. These differences called for the second  
183 approach of estimating haplotype blocks and the extent of LD between variants directly from each  
184 continental dataset having large sample size. Surprisingly, we observed different sets of variants in  
185 haplotype blocks, different length of haplotype blocks, and differences in nonsynonymous composition in  
186 haplotype blocks among the three continents datasets (**Fig 4**). **Table 3** describes characteristics of the  
187 haplotype blocks observed in the datasets from Asia, Europe, and North America.

188 **Table 2. MAF distribution of 18 variants involved in haplotype block of combined dataset in each**  
 189 **continental data.**

| SNV     | Minor allele frequency |        |        |               |               |         |          | Functional consequence | Gene   |
|---------|------------------------|--------|--------|---------------|---------------|---------|----------|------------------------|--------|
|         | Africa                 | Asia   | Europe | North America | South America | Oceania | Combined |                        |        |
| 241CT   | 0.08                   | 0.0811 | 0.2507 | 0.3231        | 0.4583        | 0.1905  | 0.49     | downstream             | 5'-UTR |
| 1059CT  | 0.24                   | 0.019  | 0.1435 | 0.1865        | 0             | 0.0289  | 0.1313   | nonsynonymous          | ORF1a  |
| 3037CT  | 0.08                   | 0.0760 | 0.2502 | 0.313         | 0.4583        | 0.1884  | 0.4804   | synonymous             | ORF1a  |
| 8782CT  | 0.04                   | 0.2304 | 0.0424 | 0.4197        | 0.2917        | 0.1884  | 0.2484   | synonymous             | ORF1a  |
| 11083GT | 0.04                   | 0.269  | 0.1339 | 0.0531        | 0.125         | 0.4928  | 0.1416   | nonsynonymous          | ORF1a  |
| 14408CT | 0.08                   | 0.0760 | 0.25   | 0.3148        | 0.4583        | 0.1884  | 0.481    | nonsynonymous          | ORF1b  |
| 14805CT | 0.08                   | 0.0047 | 0.1366 | 0.0224        | 0.3333        | 0.1159  | 0.0787   | synonymous             | ORF1b  |
| 17747CT | 0                      | 0      | 0.0106 | 0.4616        | 0             | 0.0579  | 0.174    | nonsynonymous          | ORF1b  |
| 17858AG | 0                      | 0      | 0.0097 | 0.4418        | 0             | 0.0579  | 0.1798   | nonsynonymous          | ORF1b  |
| 18060CT | 0                      | 0.0166 | 0.0088 | 0.4382        | 0             | 0.0579  | 0.1829   | synonymous             | ORF1b  |
| 23403AG | 0.08                   | 0.0783 | 0.25   | 0.3121        | 0.4583        | 0.1884  | 0.4808   | nonsynonymous          | S      |
| 25563GT | 0.32                   | 0.0213 | 0.1851 | 0.2262        | 0             | 0.0434  | 0.1647   | nonsynonymous          | ORF3a  |
| 26144GT | 0.04                   | 0.1119 | 0.1293 | 0.0211        | 0.125         | 0.1594  | 0.0923   | nonsynonymous          | ORF3a  |
| 27046CT | 0                      | 0      | 0.1114 | 0.0013        | 0.125         | 0.0144  | 0.0538   | nonsynonymous          | M      |
| 28144TC | 0.04                   | 0.2304 | 0.0407 | 0.4185        | 0.2917        | 0.1884  | 0.2483   | nonsynonymous          | N      |
| 28881GA | 0                      | 0.0381 | 0.2396 | 0.0423        | 0.375         | 0.0869  | 0.1378   | nonsynonymous          | N      |
| 28882GA | 0                      | 0.0381 | 0.2396 | 0.0410        | 0.375         | 0.0869  | 0.1374   | synonymous             | N      |
| 28883GC | 0                      | 0.0381 | 0.2396 | 0.0410        | 0.375         | 0.0869  | 0.1374   | nonsynonymous          | N      |

190 Display of minor allele frequency for each variant in different continents, the functional consequence of  
 191 these variants, and their corresponding genes. (SNV- single nucleotide variant)

192 **Table 3. Characteristics of haplotype blocks estimated from three continental datasets**

| Dataset              | Haplotype block start | Haplotype block end | Length (in kb) | Number of variants | Number of nonsynonymous variants | Variant        | MAF           |
|----------------------|-----------------------|---------------------|----------------|--------------------|----------------------------------|----------------|---------------|
| <b>Asia</b>          | 3037                  | 23403               | 20.367         | 5                  | 3                                | 3037CT         | 0.076         |
|                      |                       |                     |                |                    |                                  | 8782CT         | 0.23          |
|                      |                       |                     |                |                    |                                  | <b>11083GT</b> | <b>0.269</b>  |
|                      |                       |                     |                |                    |                                  | <b>14408CT</b> | <b>0.076</b>  |
|                      |                       |                     |                |                    |                                  | <b>23403AG</b> | <b>0.078</b>  |
| <b>Europe</b>        | 241                   | 28883               | 28.643         | 17                 | 10                               | 241CT          | 0.25          |
|                      |                       |                     |                |                    |                                  | <b>1059CT</b>  | <b>0.143</b>  |
|                      |                       |                     |                |                    |                                  | <b>1440GA</b>  | <b>0.052</b>  |
|                      |                       |                     |                |                    |                                  | 3037CT         | 0.25          |
|                      |                       |                     |                |                    |                                  | <b>11083GT</b> | <b>0.134</b>  |
|                      |                       |                     |                |                    |                                  | <b>14408CT</b> | <b>0.25</b>   |
|                      |                       |                     |                |                    |                                  | 14805CT        | 0.136         |
|                      |                       |                     |                |                    |                                  | 15324CT        | 0.062         |
|                      |                       |                     |                |                    |                                  | 17247TC        | 0.0689        |
|                      |                       |                     |                |                    |                                  | 20268AG        | 0.0734        |
|                      |                       |                     |                |                    |                                  | <b>23403AG</b> | <b>0.25</b>   |
|                      |                       |                     |                |                    |                                  | <b>25563GT</b> | <b>0.185</b>  |
|                      |                       |                     |                |                    |                                  | <b>26144GT</b> | <b>0.129</b>  |
|                      |                       |                     |                |                    |                                  | <b>27046CT</b> | <b>0.111</b>  |
|                      |                       |                     |                |                    |                                  | <b>28881GA</b> | <b>0.239</b>  |
| 28882GA              | 0.239                 |                     |                |                    |                                  |                |               |
| <b>28883GC</b>       | <b>0.239</b>          |                     |                |                    |                                  |                |               |
| <b>North America</b> | 241                   | 8782                | 8.54           | 4                  | 1                                | 241CT          | 0.323         |
|                      |                       |                     |                |                    |                                  | <b>1059CT</b>  | <b>0.186</b>  |
|                      |                       |                     |                |                    |                                  | 3037CT         | 0.313         |
|                      |                       |                     |                |                    |                                  | 8782CT         | 0.419         |
|                      | 14408                 | 28144               | 13.737         | 7                  | 6                                | <b>14408CT</b> | <b>0.3148</b> |
|                      |                       |                     |                |                    |                                  | <b>17747CT</b> | <b>0.462</b>  |
|                      |                       |                     |                |                    |                                  | <b>17858AG</b> | <b>0.442</b>  |
|                      |                       |                     |                |                    |                                  | 18060CT        | 0.438         |
|                      |                       |                     |                |                    |                                  | <b>23403AG</b> | <b>0.312</b>  |
|                      |                       |                     |                |                    |                                  | <b>25563GT</b> | <b>0.226</b>  |
| <b>28144TC</b>       | <b>0.418</b>          |                     |                |                    |                                  |                |               |

193 Characteristics presentation of haplotype blocks estimated from the datasets obtained from Asia, Europe  
 194 and North America. Nonsynonymous variants are shown with bold font.

## 195 **Structural analysis of SARS-CoV-2 mutations**

196 **D614G mutation.** Wrapp et al. recently solved the cryo-EM structure of the S protein with 3.5 Å resolution  
197 [26] (**Fig 5 A**). The S protein has many flexible loop regions that were not visible in the structure, including  
198 the RRAR cleavage site. Therefore, we modeled-in the cleavage site and the undetected flexible regions  
199 using the cryo-EM structure PDB ID: 6M71 as a scaffold [27]. **Fig 5 B** shows the overlay of the S protein  
200 from PDB ID:6VSB with the modelled S protein, with an RMSD of 0.25 Å. As shown in the overlay figure,  
201 there are more loops present in the modelled structure that were not detected by Cryo-EM. The RRAR  
202 cleavage site (**Fig 5 C**) shows a high surface accessible region, where the viral protein can attach to the host  
203 protein. As such, any mutations on the S protein especially close to RRAR site might alter its activity.  
204 D614G is a mutation believed to increase SARS-CoV-2 virulence [9]. One possibility is that the change  
205 from a negatively charged aspartate to a non-polar glycine may modify the structure and therefore the  
206 function of the protein. Charged amino acids form ionic and hydrogen bonds (H-bond) through their side  
207 chains and stabilize proteins [30]. The targeted aspartate is present in the loop region, therefore a mutation  
208 to a glycine would cause unfolding of the loop and possibly render it more flexible making the FURIN  
209 cleavage site more accessible.

210 D614 is in close vicinity to T859 of the adjacent monomer's S2 (Chain B) where they can form a H-bond  
211 (**Fig 6**) through both sidechains. In addition, backbone H-bonds can be formed with A646 of the same  
212 chain. It was documented that S2 domains alter their structure after FURIN site cleavage [31]. Therefore,  
213 the mutation of D614 to G might weaken the stability of S2 and make cell entry more aggressive. It is  
214 probably the loss of the H-bond between D614 (S1/Chain A) and T859 (S2/Chain B) that stops the hinging  
215 of the S2 domain making it more flexible in the transition state when interacting with the host cell receptor.  
216 Another possibility would be that the mutation to G and the loss of the H-bond to the adjacent chain made  
217 the protein more flexible. A thermodynamic analysis showed that D614G mutation resulted in slightly  
218 destabilizing the protein with a  $\Delta\Delta G$ : -0.086 kcal/mol and in increasing in vibrational entropy  $\Delta\Delta S_{\text{vib}}$  0.137  
219 kcal.mol<sup>-1</sup>.K<sup>-1</sup> as seen in **Fig 7 A** where the red parts indicate more flexibility. Since this mutation will occur

220 on the trimeric structure of the S-protein, all the three domains will be more flexible. Such flexibility will  
221 render the FURIN cleavage site more accessible which is concomitant with the virulence of the D614G  
222 mutation. Furthermore, the flexibility observed in the ribosomal binding domain region (**Fig 7**) may  
223 facilitate the binding of ACE2 to the S protein [26].

224 **P314L mutation.** ORF1a and ORF1b produce a set of non-structural proteins (nsp) which assemble to  
225 facilitate viral replication and transcription (nsp7, nsp8 and nsp12) [32]. The nucleoside triphosphate (NTP)  
226 entry site and the nascent RNA strand exit paths has positively charged aa, is solvent accessible, and is  
227 conserved in SARS-CoV-2 (**Fig 8**). P314L mutation is positioned on the interface domain of the RdRp (or  
228 nsp12) between A250-R365 residues. Previous studies have shown that the interface domain has functional  
229 significance in the RdRp of *Flavivirus*. In addition, when polar or charged residue mutations were  
230 introduced into these sites, viral replication levels were significantly affected [33]. Thus, mutations on  
231 nsp12 interface residues may affect the polymerase activity and RNA replication of SARS-CoV-2. Proline  
232 is often found in very tight turns in protein structures and can also function to introduce kinks into  $\alpha$ -helices.  
233 In **Fig 9**, we investigated the proposed intermolecular bonds that P314 can make, where the backbone COO<sup>-</sup>  
234 group of proline can form H-bonds with the backbone NH groups of T and S or the OH<sup>-</sup>group of S side  
235 chain. Whereas the pyrrolidine forms hydrophobic interactions with the W268 and F275. The mutation to  
236 leucine tightens the structure and reduces the flexibility with an increase in  $\Delta\Delta G$ : 0.717 kcal/mol and a  
237 decrease in vibrational entropy to  $\Delta\Delta S_{vib}$  ENCoM: -0.301 kcal.mol<sup>-1</sup>.K<sup>-1</sup> (**Fig 10**). Furthermore, leucine  
238 possesses a non-polar side chain, seldomly involving catalysis, which can play a role in substrate  
239 recognition such as binding/recognition of hydrophobic ligands. L314 backbone COO<sup>-</sup> forms a H-bond  
240 with the sidechain OH<sup>-</sup> group of S325, in addition to a hydrophobic interaction with W68 and L270. L270  
241 is positioned on top of the flexible loop region, therefore forming a hydrophobic interaction, displacing any  
242 possibility of water molecules entering the looped region thus making it more compact. The overall  
243 improved stability of RdRp can make it more efficient in RNA replication and hence increasing SARS-  
244 CoV-2 virulence.

## 245 **Discussion**

246 Our pairwise homoplasy index tests suggest that, among continental datasets, European and North  
247 American sequences have shown evidence for the presence of recombination events (P-value = 0.001 and  
248 0.007 respectively); while African, Oceanic, South American, and Asian datasets have shown no  
249 recombination events till now. This again shows that the European and North American continents are at  
250 higher risk of having super evolved viruses that can co-infect their hosts. Thus far, these recombination  
251 effects might also lead to the deletion of big portions of RNA such as the one reported in a recent article,  
252 where an 81-nucleotide deletion was detected in SARS-CoV-2 ORF7a [34]. Similar deletions might give rise to  
253 attenuated viruses and aid vaccine design.

254 Depending on variance seen within the clustered samples, PCA analysis indicated that clustering in Europe  
255 and North America is probably associated with a founder effect where a single mutation was introduced  
256 and subsequently transmitted; 23403AG in Europe and 28144TC in North America. Admixture analysis  
257 identified differing number of clusters of viral strains in different continents: Europe with six clusters, South  
258 America with five, North America with four, and Africa and Asia with two each. Both strong and weak LD  
259 blocks are seen among clusters of strains in every continent; the four dominant strains in Europe have  
260 significant proportion of strong and weak LD signatures in them. Proportions of strains carrying missense  
261 variants over nonsynonymous variants differ among continents – five clusters of missense variants are  
262 dominant in Europe, three in North American while two clusters of missense variants are dominant in Asia,  
263 Africa, and South America. In regard to recombination patterns, European and North American continents  
264 showed evidence for the presence of recombination events among SARS-CoV-2 genomes which give  
265 indication of continuing evolution among SARS-CoV-2 viral strains.

266 Admixture analysis has shown 7 different strains with differential segregation of alleles in SARS-CoV-2 isolates.  
267 Upon constricting variants with strong LD, the proportional assignment did not change in Africa and Asia, whereas  
268 it changed in Europe, North America, Oceania, and South America. In fact, proportions in Europe (C2 & C3) and

269 North America (C2 & C4) increased excessively suggesting that strong LD sites are present in more than one strain  
270 in each of these two continents. Presence of an un-admixed block pattern of strong LD between strains suggests that  
271 LD sites are not broken by significant recombination seen in these two continents. This is either due to their physical  
272 distance or natural selection. On the contrary, weak LD sites have shown clear admixture between strains. Strikingly,  
273 each continent is dominated by different set of nonsynonymous clusters such as Africa by C4, Asia by C1, Europe  
274 by C2, North America by C3, Oceania by C5, and South America by C2. This is also evident from the allele  
275 frequency variation seen in each continent.

276 Further, continental-wise haplotype block estimation enabled us to identify variation of linked nonsynonymous and  
277 synonymous sites in Asia, Europe, and North America. Although selection primarily acts on variation that undergo  
278 amino acid change, many synonymous variants were observed in haplotype blocks. This suggests that these  
279 synonymous sites hitch-hiked along with nonsynonymous variants due to their physical proximity. Another  
280 observed interesting feature was the variation in the number of nonsynonymous sites between Asia, Europe, and  
281 North America. Asian haplotype block carried three nonsynonymous variants, Europe haplotype block carried ten  
282 nonsynonymous variants, and North American haplotype block carried seven nonsynonymous variants. This  
283 suggests that the initial strain which originated and travelled from Asia had less functional sites whereas coinfection-  
284 led recombination in Europe and North America enriched functional sites in strains.

285 Our preliminary structural analysis of the European strain main mutations, D614G located in the spike gene  
286 and P314L located in the RdRp gene, showed that the first mutation will render the FURIN cleavage site  
287 more accessible while the latter would increase protein stability. 73% of the European samples have both  
288 mutations segregating together; while in Africa only 11% of the sequenced viral samples have them. This  
289 is probably the reason behind the elevated mortality rates in Europe. This points out to the fact that the virus  
290 has evolved at an alarming rate by introducing two mutations that increase its chances of survival. The  
291 European strain harbors additional mutations, notably the hotspot mutations R203K and G204R that cluster  
292 in a serine-rich linker region at the RdRp. It was suggested that these mutations might potentially enhance



293 RNA binding and replication and may alter the response to serine phosphorylation events [35], which might  
294 further exacerbates SARS-CoV-2 virulence.

295 We understand that other confounding factors like SARS-CoV-2 testing, socioeconomical status, the  
296 availability of proper medical services, and the burden of other diseases are important contributors to the  
297 disparities seen in mortality rates around the world. It is imperative that more comprehensive studies should  
298 be conducted as more patient data emerges from different parts of the world. We also realize that our  
299 analysis focuses only on the early spread samples and that we have to keep analyzing the viral sequences  
300 to determine if recombination is occurring between other strains and identify any new mutations specially  
301 since the world is currently fighting the second wave of the virus. Our data highlight the urgent need to  
302 correlate patients' medical/infection history to the viral variants in order to predict in a more accurate and  
303 personalized way how different viral strains are influencing this pandemic.

## 304 Acknowledgements

305 We gratefully acknowledge the authors from originating and submitting laboratories of the sequences in  
306 GISAID's EpiFlu™ Database on which this research is based. All data submitters may be contacted  
307 directly via [www.gisaid.org](http://www.gisaid.org).

## 308 References

- 309 1. Poland GA. SARS-CoV-2: a time for clear and immediate action. *The Lancet Infectious Diseases*.  
310 Lancet Publishing Group; 2020. pp. 531–532. doi:10.1016/S1473-3099(20)30250-4
- 311 2. Ovsyannikova IG, Haralambieva IH, Crooke SN, Poland GA, Kennedy RB. The role of host  
312 genetics in the immune response to SARS-CoV-2 and COVID-19 susceptibility and severity.  
313 *Immunol Rev*. 2020;296: 205–219. doi:10.1111/imr.12897
- 314 3. Fung TS, Liu DX. Human coronavirus: Host-pathogen interaction. *Annual Review of*  
315 *Microbiology*. Annual Reviews Inc.; 2019. pp. 529–557. doi:10.1146/annurev-micro-020518-  
316 115759
- 317 4. Xi J, Xu K, Jiang P, Lian J, Hao S, Jia H, et al. Virus strain of a mild COVID-19 patient in  
318 Hangzhou representing a new trend in SARS-CoV-2 evolution related to Furin cleavage site.  
319 *medRxiv*. 2020; 2020.03.10.20033944. doi:10.1101/2020.03.10.20033944
- 320 5. Poland GA, Bass J, Goldstein MR. SARS-CoV-2 Infections: An ACE in the Hole and Systems  
321 Biology Studies—a Research Agenda. *Mayo Clinic Proceedings*. Elsevier Ltd; 2020. pp. 1838–  
322 1841. doi:10.1016/j.mayocp.2020.06.044
- 323 6. Yan R, Zhang Y, Li Y, Xia L, Guo Y, Zhou Q. Structural basis for the recognition of SARS-CoV-  
324 2 by full-length human ACE2. *Science* (80- ). 2020;367: 1444–1448. doi:10.1126/science.abb2762
- 325 7. Adhikari P, Li N, Shin M, Steinmetz NF, Twarock R, Podgornik R, et al. Intra- And

- 326 intermolecular atomic-scale interactions in the receptor binding domain of SARS-CoV-2 spike  
327 protein: Implication for ACE2 receptor binding. *Phys Chem Chem Phys*. 2020;22: 18272–18283.  
328 doi:10.1039/d0cp03145c
- 329 8. Shaminur Rahman M, Rafiul Islam M, Nazmul Hoque M, M Rubayet Ul Alam AS, Akther M,  
330 Akter Puspo J, et al. Comprehensive annotations of the mutational spectra of SARS-CoV-2 spike  
331 protein: a fast. *bioRxiv*. 2020; 2020.06.29.177238. doi:10.1101/2020.06.29.177238
- 332 9. Eaaswarkhanth M, Madhoun A Al, Al-Mulla F. Could the D614 G substitution in the SARS-CoV-  
333 2 spike (S) protein be associated with higher COVID-19 mortality? *Int J Infect Dis*. 2020 [cited 26  
334 May 2020]. doi:10.1016/j.ijid.2020.05.071
- 335 10. Poland GA, Ovsyannikova IG, Crooke SN, Kennedy RB. SARS-CoV-2 Vaccine Development:  
336 Current Status. *Mayo Clinic Proceedings*. Elsevier Ltd; 2020. pp. 2172–2188.  
337 doi:10.1016/j.mayocp.2020.07.021
- 338 11. Phan T. Genetic diversity and evolution of SARS-CoV-2. *Infect Genet Evol*. 2020;81.  
339 doi:10.1016/j.meegid.2020.104260
- 340 12. Kasibhatla SM, Kinikar M, Limaye S, Kale MM, Kulkarni-Kale U. Understanding evolution of  
341 SARS-CoV-2: a perspective from analysis of genetic diversity of RdRp gene. *J Med Virol*. 2020.  
342 doi:10.1002/jmv.25909
- 343 13. Bai Y, Jiang D, Lon JR, Chen X, Hu M, Lin S, et al. Evolution and molecular characteristics of  
344 SARS-CoV-2 genome. *bioRxiv*. 2020; 2020.04.24.058933. doi:10.1101/2020.04.24.058933
- 345 14. Shu Y, McCauley J. GISAID: Global initiative on sharing all influenza data – from vision to  
346 reality. *Eurosurveillance*. European Centre for Disease Prevention and Control (ECDC); 2017.  
347 doi:10.2807/1560-7917.ES.2017.22.13.30494
- 348 15. Katoh K, Standley DM. MAFFT multiple sequence alignment software version 7: Improvements

- 349 in performance and usability. *Mol Biol Evol.* 2013. doi:10.1093/molbev/mst010
- 350 16. Capella-Gutiérrez S, Silla-Martínez JM, Gabaldón T. trimAl: A tool for automated alignment  
351 trimming in large-scale phylogenetic analyses. *Bioinformatics.* 2009.  
352 doi:10.1093/bioinformatics/btp348
- 353 17. Shen W, Le S, Li Y, Hu F. SeqKit: A Cross-Platform and Ultrafast Toolkit for FASTA/Q File  
354 Manipulation. Zou Q, editor. *PLoS One.* 2016;11: e0163962. doi:10.1371/journal.pone.0163962
- 355 18. Page AJ, Taylor B, Delaney AJ, Soares J, Seemann T, Keane JA, et al. SNP-sites: rapid efficient  
356 extraction of SNPs from multi-FASTA alignments. *Microb genomics.* 2016;2: e000056.  
357 doi:10.1099/mgen.0.000056
- 358 19. Wang K, Li M, Hakonarson H. ANNOVAR: Functional annotation of genetic variants from high-  
359 throughput sequencing data. *Nucleic Acids Res.* 2010. doi:10.1093/nar/gkq603
- 360 20. Chang CC, Chow CC, Tellier LCAM, Vattikuti S, Purcell SM, Lee JJ. Second-generation PLINK:  
361 Rising to the challenge of larger and richer datasets. *Gigascience.* 2015. doi:10.1186/s13742-015-  
362 0047-8
- 363 21. Barrett JC, Fry B, Maller J, Daly MJ. Haploview: Analysis and visualization of LD and haplotype  
364 maps. *Bioinformatics.* 2005. doi:10.1093/bioinformatics/bth457
- 365 22. Bruen TC, Philippe H, Bryant D. A simple and robust statistical test for detecting the presence of  
366 recombination. *Genetics.* 2006. doi:10.1534/genetics.105.048975
- 367 23. Alexander DH, Novembre J, Lange K. Fast model-based estimation of ancestry in unrelated  
368 individuals. *Genome Res.* 2009. doi:10.1101/gr.094052.109
- 369 24. Kopelman NM, Mayzel J, Jakobsson M, Rosenberg NA, Mayrose I. Clumpak: A program for  
370 identifying clustering modes and packaging population structure inferences across K. *Mol Ecol*  
371 *Resour.* 2015. doi:10.1111/1755-0998.12387

- 372 25. Gao Y, Yan L, Huang Y, Liu F, Zhao Y, Cao L, et al. Structure of the RNA-dependent RNA  
373 polymerase from COVID-19 virus. *Science* (80- ). 2020;368: eabb7498.  
374 doi:10.1126/science.abb7498
- 375 26. Loganathan SK, Schleicher K, Malik A, Quevedo R, Langille E, Teng K, et al. Rare driver  
376 mutations in head and neck squamous cell carcinomas converge on NOTCH signaling. *Science*  
377 (80- ). 2020;367: 1264–1269. doi:10.1126/science.aax0902
- 378 27. Waterhouse A, Bertoni M, Bienert S, Studer G, Tauriello G, Gumienny R, et al. SWISS-MODEL:  
379 Homology modelling of protein structures and complexes. *Nucleic Acids Res.* 2018.  
380 doi:10.1093/nar/gky427
- 381 28. Rodrigues CHM, Pires DEV, Ascher DB. DynaMut: Predicting the impact of mutations on protein  
382 conformation, flexibility and stability. *Nucleic Acids Res.* 2018. doi:10.1093/nar/gky300
- 383 29. Maynard Smith J. Byte-sized evolution. *Nature*. Nature Publishing Group; 1992. pp. 772–773.  
384 doi:10.1038/355772a0
- 385 30. Zhou HX, Pang X. Electrostatic Interactions in Protein Structure, Folding, Binding, and  
386 Condensation. *Chemical Reviews*. American Chemical Society; 2018. pp. 1691–1741.  
387 doi:10.1021/acs.chemrev.7b00305
- 388 31. Xia S, Lan Q, Su S, Wang X, Xu W, Liu Z, et al. The role of furin cleavage site in SARS-CoV-2  
389 spike protein-mediated membrane fusion in the presence or absence of trypsin. *Signal*  
390 *Transduction and Targeted Therapy*. Springer Nature; 2020. pp. 1–3. doi:10.1038/s41392-020-  
391 0184-0
- 392 32. te Velthuis AJW, Arnold JJ, Cameron CE, van den Worm SHE, Snijder EJ. The RNA polymerase  
393 activity of SARS-coronavirus nsp12 is primer dependent. *Nucleic Acids Res.* 2009.  
394 doi:10.1093/nar/gkp904

- 395 33. Wu J, Liu W, Gong P. A Structural Overview of RNA-Dependent RNA Polymerases from the  
396 Flaviviridae Family. *Int J Mol Sci.* 2015;16: 12943–12957. doi:10.3390/ijms160612943
- 397 34. Holland LA, Kaelin EA, Maqsood R, Estifanos B, Wu LI, Varsani A, et al. An 81 nucleotide  
398 deletion in SARS-CoV-2 ORF7a identified from sentinel surveillance in Arizona (Jan-Mar 2020).  
399 *J Virol.* 2020 [cited 19 May 2020]. doi:10.1128/JVI.00711-20
- 400 35. Guan Q, Sadykov M, Nugmanova R, Carr MJ, Arold ST, Pain A. The genomic variation landscape  
401 of globally-circulating clades of SARS-CoV-2 defines a genetic barcoding scheme. *bioRxiv.* 2020;  
402 2020.04.21.054221. doi:10.1101/2020.04.21.054221
- 403

404 **Fig 1**

405

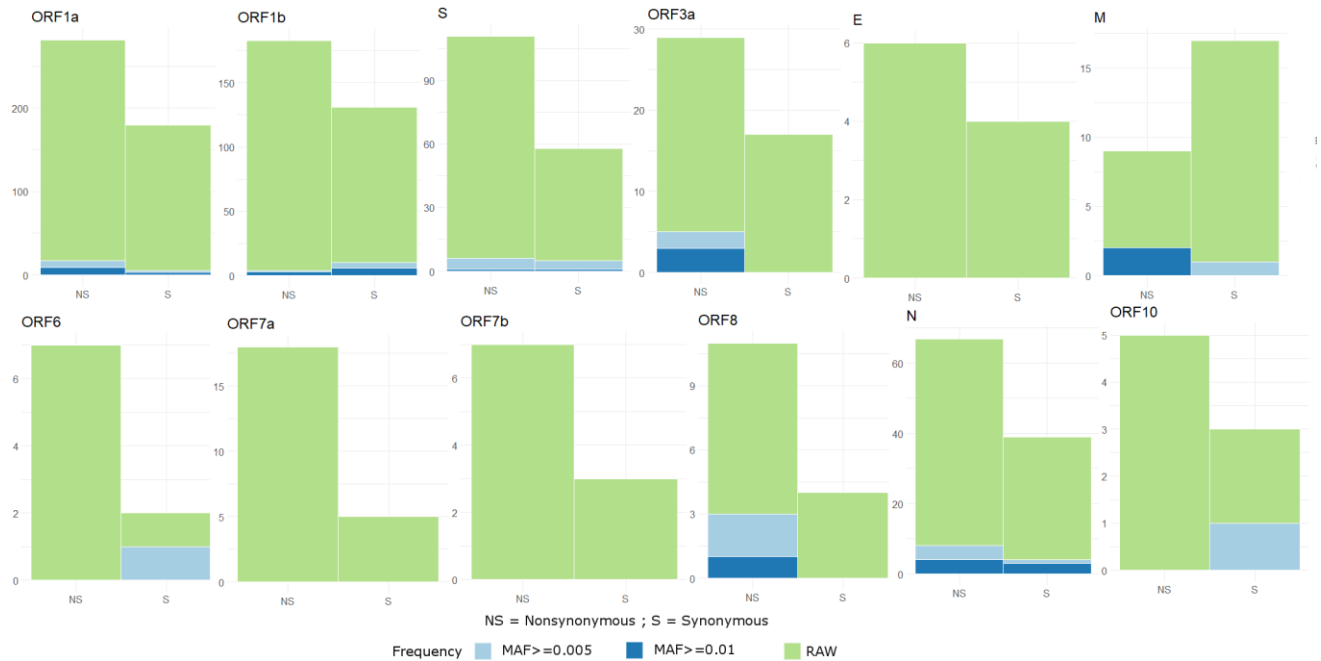

406

407 **Fig 1. Detection and classification of mutations from GISAID SARS-CoV-2 genome sequences.**

408 Illustration of the distribution of synonymous and nonsynonymous variants for each gene in RAW,  $MAF \geq$

409  $0.5\%$ , and  $MAF \geq 1\%$  thresholds. With a threshold at  $MAF \geq 0.5\%$ , a set of 72 variants in total was observed

410 and utilized in subsequent analysis. MAF: Minor Allele Frequency.

411 **Fig 2**

412

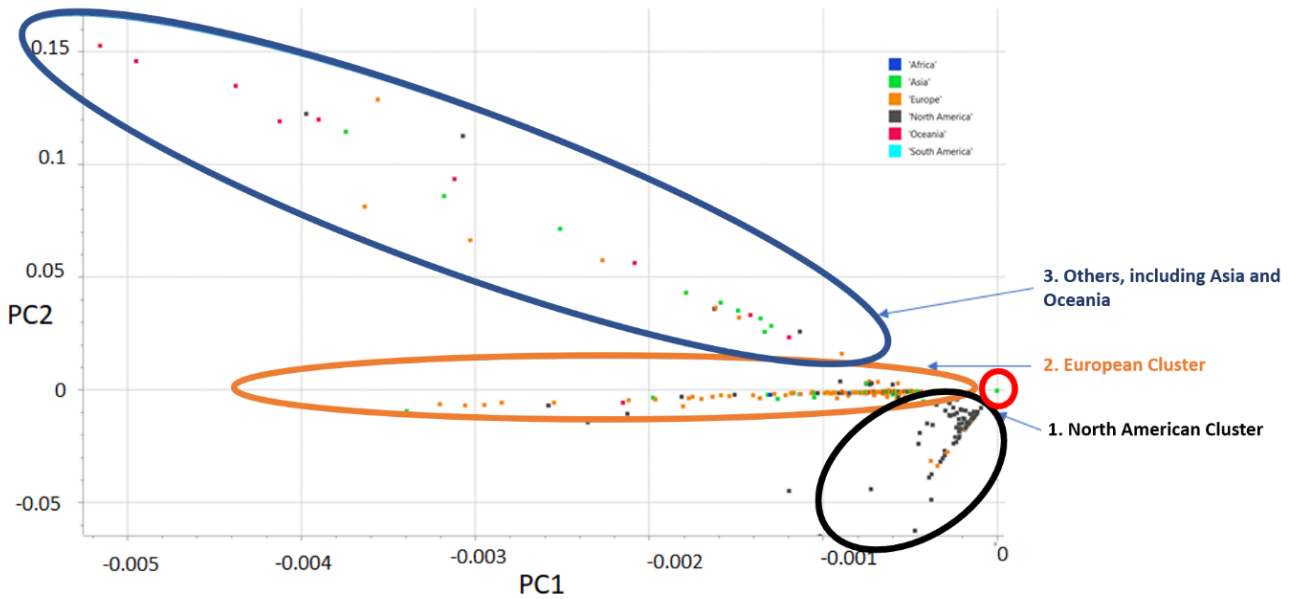

413

414 **Fig 2. Principal Component Analysis using 2352 GISAID sequences.** Principal Component Analysis of  
415 2352 SARS-CoV-2 sequences shows three distinct clusters of color-coded samples (see the legend for their  
416 continent of origin). All three clusters diverge from a single point (red circle). The North American cluster  
417 (black oval) shows least variance among the three. The European cluster (orange oval) is well defined with  
418 few interspersed Asian samples, an indication of its origin. The third cluster (Blue oval) shows the most  
419 variance and includes samples from Oceania, Asia, and others.

420



421 **Fig 3**

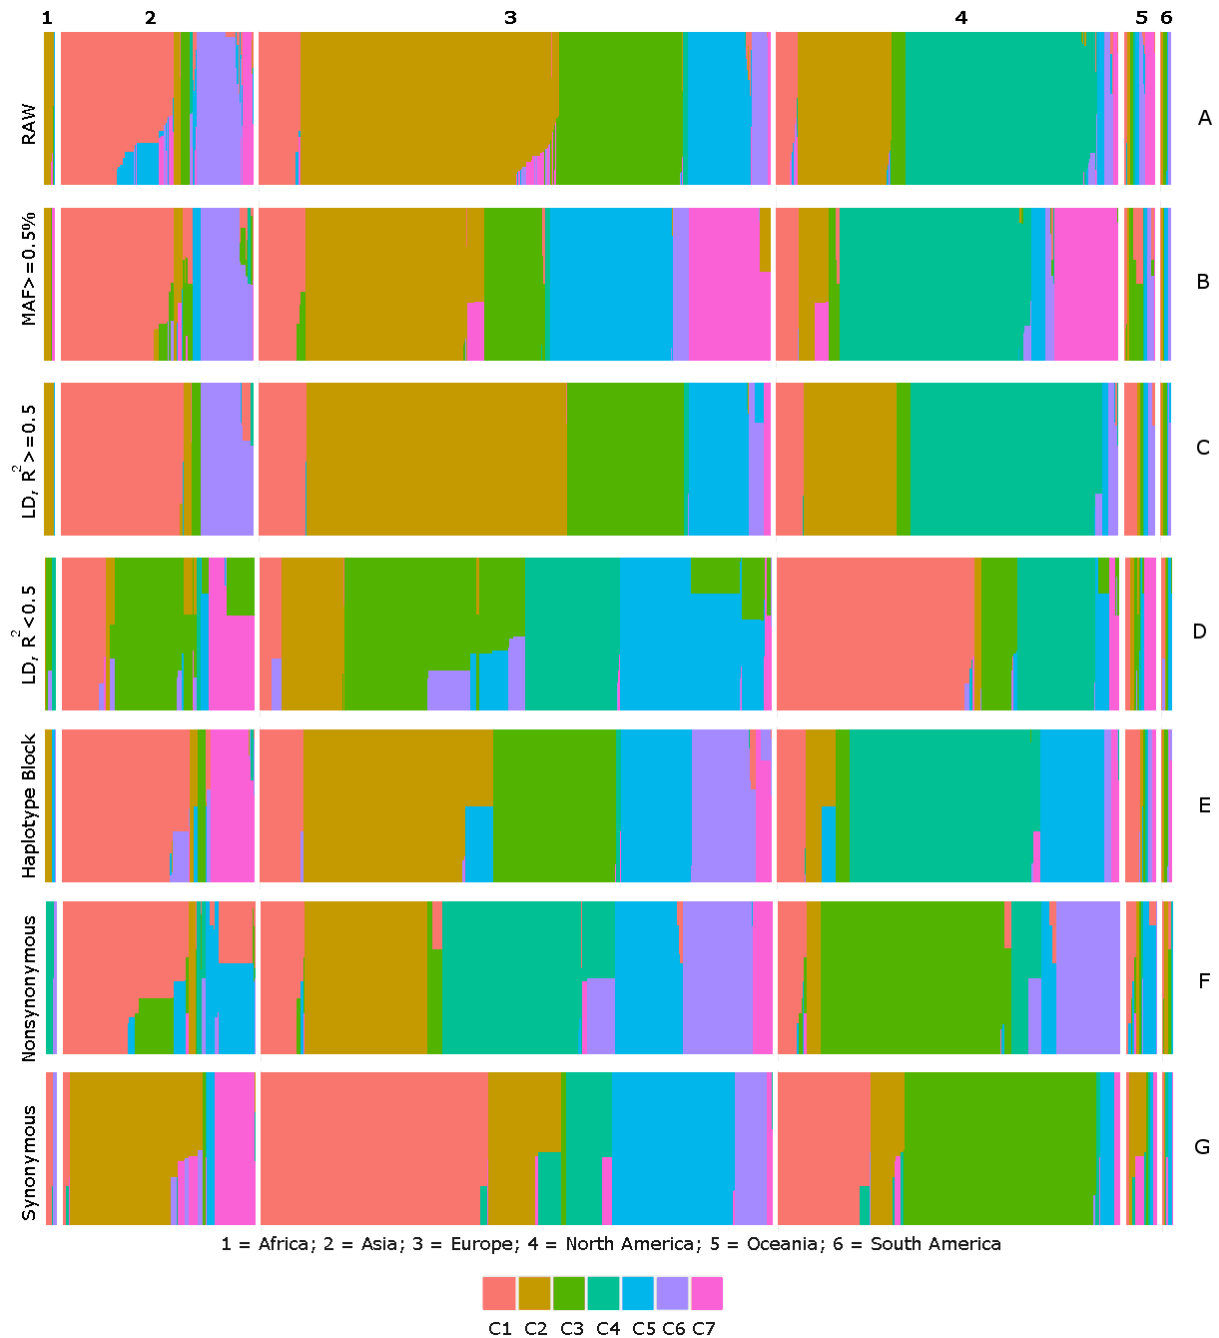

422

423 **Fig 3. Identification of SARS-CoV-2 genetic clusters in different continents.** Illustration of seven color

424 coded (C1 to C7) genetic subdivisions of SARS-CoV-2 across continents using variants with a  $MAF \geq 0.5\%$

425 frequency. Differential proportions of strong LD (C), weak LD (D), haplotype block (E), nonsynonymous

426 (F), and synonymous (G) variants across continental datasets are shown.

427 **Fig 4**

428

**Asia**

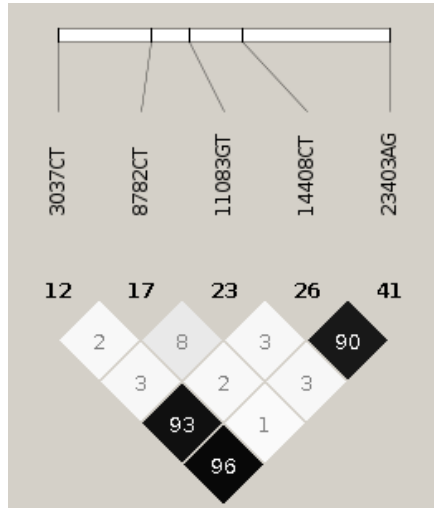

**Europe**

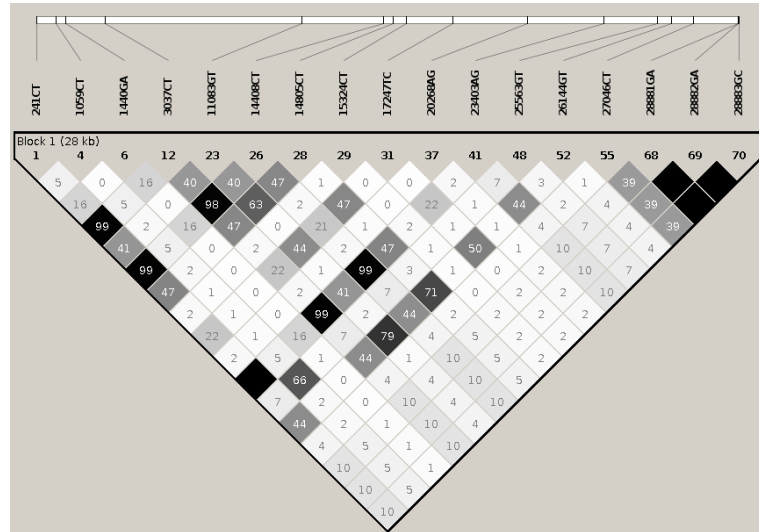

**North America (Block 1)**

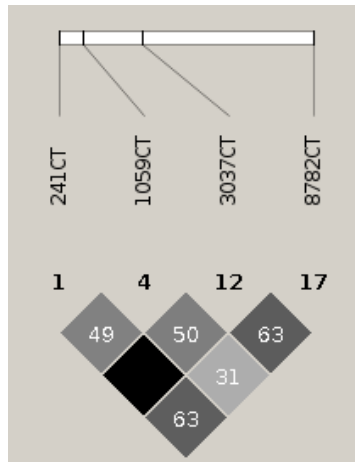

**North America (Block 2)**

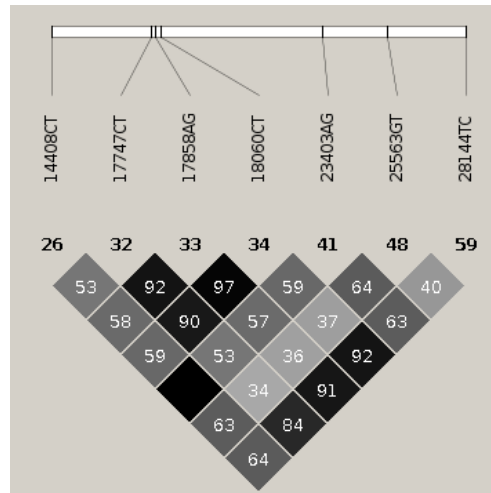

429 **Fig 4. Estimation of haplotype blocks in continental samples.** Haplotype block estimation and extent  
 430 of Linkage disequilibrium observed between variants in Asia, Europe, and North America, identified a  
 431 single block with different lengths in Asia and Europe, while in North America two blocks were  
 432 identified.

433

434 **Fig 5**

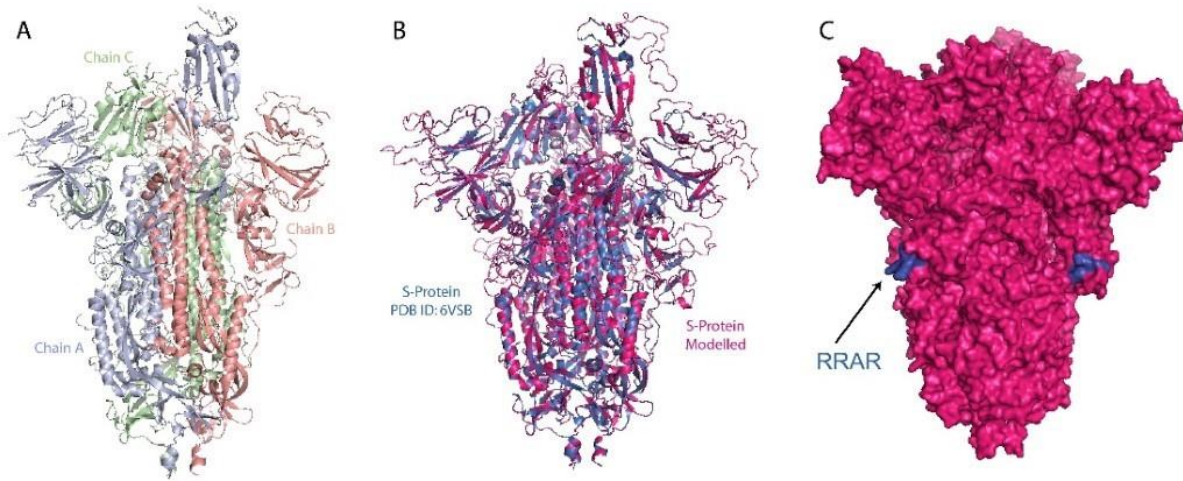

435  
436 **Fig 5. 3D modeling of SARS-CoV-2 Spike protein.** (A) Trimeric structure of SARS-CoV-S spike like  
437 protein (PBD:6VSB). (B) Overlay of the SARS-CoV-S spike like protein (PBD ID: 6VSB, blue) with the  
438 modelled SARS-CoV-2 S protein (PDB ID: 6M71, magenta). (C) The surface of the modelled S-protein  
439 with the RRAR FURIN cleavage site (blue)

440 **Fig 6**

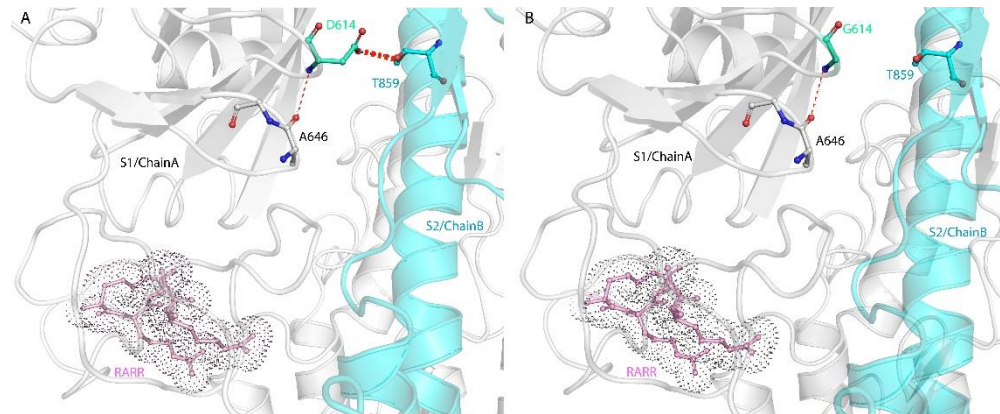

441

442 **Fig 6. 3D modeling of SARS-CoV-2 Spike protein showing suggested bonds for D614.** (A) Suggested

443 hydrogen bond (red dashed lines) of D614 (S1 domain chain A) with T859 (S2 domain chain B) and D614

444 and A646 of S1 domain chain A. (B) The suggested hydrogen bond can be disrupted with the D614G

445 mutation altering the activity of the protein.

446

447 **Fig 7**

448

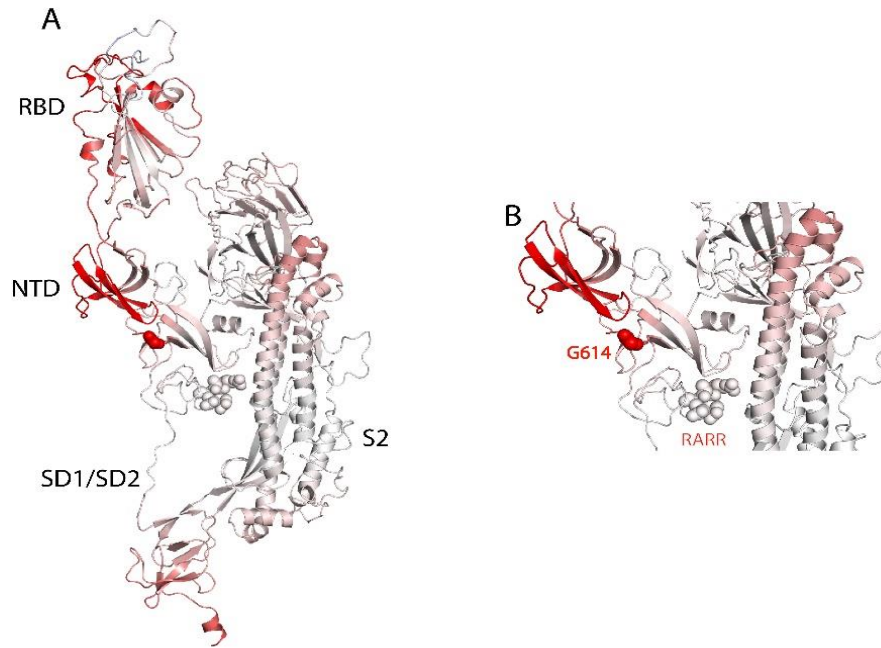

449

450 **Fig 7. 3D modeling of G614 mutation.** (A) S-protein monomer 6VSB D614G, the red region of the protein  
451 depicts the more flexible region of the protein due to the D614G mutation with a decreased stability of  
452  $\Delta\Delta G$ : -0.086 kcal/mol and in increase in vibrational entropy  $\Delta\Delta S_{Vib}$  0.137 kcal.mol<sup>-1</sup>.K<sup>-1</sup>. (B) The G614  
453 mutation (in red) suggests an increased flexibility of the region of the S-protein.

454 **Fig 8**

455

456

457

458

459

460

461

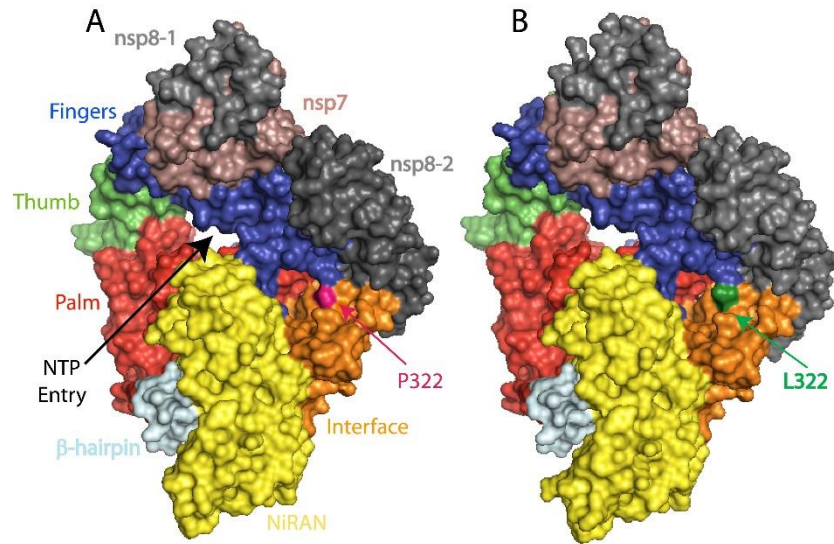

462 **Fig 8. SARS-CoV-2 RNA-dependent RNA polymerase structure in complex with nsp7 and two nsp8.**

463 Viral RNA template entry and the NTP entries are shown in black arrow heads, prospective route for the

464 release of RNA template and product after replication is shown in black arrow and two dash black arrows.

465 The active site is a large groove with several structural pockets. (A) Wild type RdRp complex P314 (in

466 pink) (B) L314 mutation (in green color). RdRp-RNA-dependent RNA polymerase.

467 **Fig 9**

468

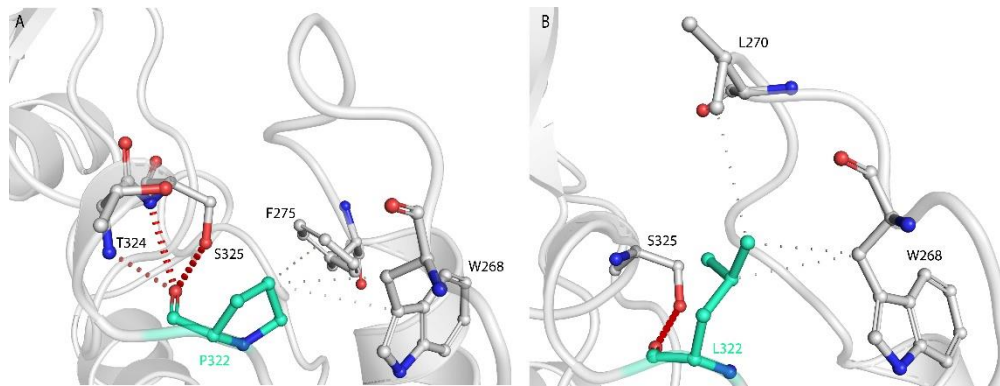

469

470 **Fig 9. 3D modeling of P314L mutation.** (A) Suggested bonding network of P314 where the COO- group  
471 might form H-bonds with the backbone NH of T324 and S325 and the side chain of S325. The white dashed  
472 lined depict the hydrophobic interactions between P314 and W268 and F275. (B) L314 forms a H-bond  
473 with the side chain of S325 and forms a hydrophobic interaction with L270 which is at the curve of the loop  
474 bringing making that region more compact.



475 **Fig 10**

476

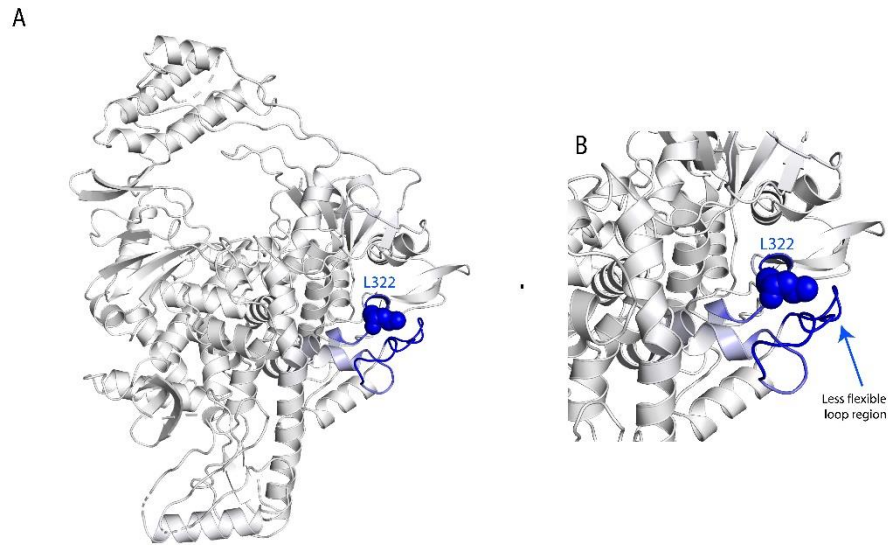

477

478 **Fig 10. 3D depiction of the less relaxed loop caused by L314 mutation.** (A) RNA-dependent RNA  
479 polymerase structure, the blue region of the protein depicts the more rigid region due to the mutation P314L,  
480 with an increase in stability of in  $\Delta\Delta G$ : 0.717 kcal/mol and a decrease in vibrational entropy to  $\Delta\Delta S_{Vib}$   
481 ENCoM: -0.301 kcal.mol<sup>-1</sup>.K<sup>-1</sup>. (B) The less flexible loop region because of the tight hydrophobic  
482 interaction between L314 (L322 in structure) and hydrophobic residues in the moiety.

483



484 **Supporting Information:**

485 **Supplementary Figure S1. Principal Component Analysis for the 2352 SARS-CoV-2 sequences**  
486 **distributed by their collection month.** Principal Component Analysis (PCA) plot based on the collection  
487 month (January, February, March) for the 2352 SARS-CoV-2 sequences extracted from GISAID data; PC1  
488 (EV=9.7030), PC2 (EV=8.84814). Red circle indicates the founder strain that was sequenced in January.

489 **Supplementary Figure S2. Trend of CV error in RAW and in variants filtered for  $MAF \geq 0.5\%$ .** The  
490 CV for the  $MAF > 0.5\%$  dataset comprised 72 variants shown.  $K = 7$  is the best fit (upon observing  
491 consistency in CV error between raw and  $MAF \geq 0.5\%$  at  $K=7$ , optimum number of clusters 7 was selected;  
492 the inconsistency observed in RAW from  $K=8$  may be resulting from  $MAF < 0.5\%$  variants), suggesting that  
493 7 different SARS-CoV-2 strains existed in early transmission of SARS-CoV-2 across continents. (CV-cross  
494 validation procedure).

495 **Supplementary Figure S3. Linkage disequilibrium (LD) variation in haplotype block of combined**  
496 **dataset in each continental dataset.** Extent of LD variation observed in each continental dataset when  
497 haplotype block comprising the set of 18 variants identified in combined dataset were mapped to continental  
498 datasets.
