# Supplementary material for: SARS-CoV-2: Proof of recombination between strains and emergence of possibly more virulent ones
Source: bioRxiv or medRxiv preprint supplement (doi:10.1101/2020.11.11.20229765), 2020-11-15
Supplement: Supplementary file [file media-1.pdf]

# **SARS-CoV-2: Proof of recombination between strains and emergence of possibly more virulent ones.**

Dania Haddad<sup>1</sup>, Sumi Elsa John<sup>1</sup>, Anwar Mohammad<sup>2</sup>, Maha M Hammad<sup>2</sup>, Prashantha Hebbar<sup>1</sup>, Arshad Channanath<sup>1</sup>, Rasheeba Nizam<sup>1</sup>, Sarah Al-Qabandi<sup>3</sup>, Ashraf Al Madhoun<sup>1</sup>, Abdullah Alshukry<sup>4</sup>, Hamad Ali<sup>1,5</sup>, Thangavel Alphonse Thanaraj<sup>1\*</sup>, Fahd Al-Mulla<sup>1\*</sup>.

<sup>1</sup> Department of Genetics and Bioinformatics, Dasman Diabetes Institute, Kuwait

<sup>2</sup> Department of Biochemistry and Molecular Biology, Dasman Diabetes Institute, Kuwait

<sup>3</sup> Public Health Laboratory, Ministry of Health, Kuwait

<sup>4</sup> Department of Otolaryngology & Head and Neck Surgery, Jaber Al-Ahmad Hospital, Ministry of Health, Kuwait

<sup>5</sup> Department of Medical Laboratory Sciences, Faculty of Allied Health Sciences, Health Sciences Center, Kuwait University, Kuwait

\* Author to whom correspondence should be addressed.

Corresponding authors:

Fahd Al-Mulla  
P.O. Box 1180, Dasman 15462, Kuwait  
[fahd.almulla@dasmaninstitute.org](mailto:fahd.almulla@dasmaninstitute.org)

Alphonse T. Thangavel  
P.O. Box 1180, Dasman 15462, Kuwait  
[alphonse.thangavel@dasmaninstitute.org](mailto:alphonse.thangavel@dasmaninstitute.org)

## Supplementary Material

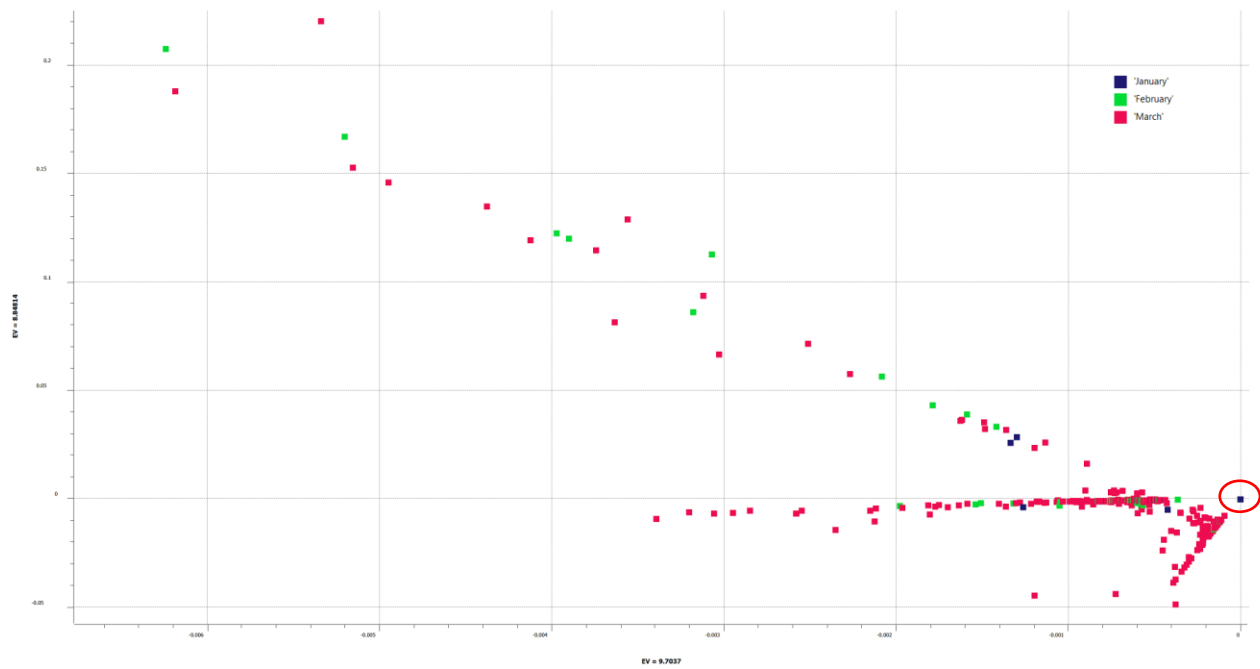

**Supplementary Figure S1. Principal Component Analysis for the 2352 SARS-CoV-2 sequences distributed by their collection month.** Principal Component Analysis (PCA) plot based on the collection month (January, February, March) for the 2352 SARS-CoV-2 sequences extracted from GISAID data; PC1 (EV=9.7030), PC2 (EV=8.84814). Red circle indicates the founder strain that was sequenced in January.

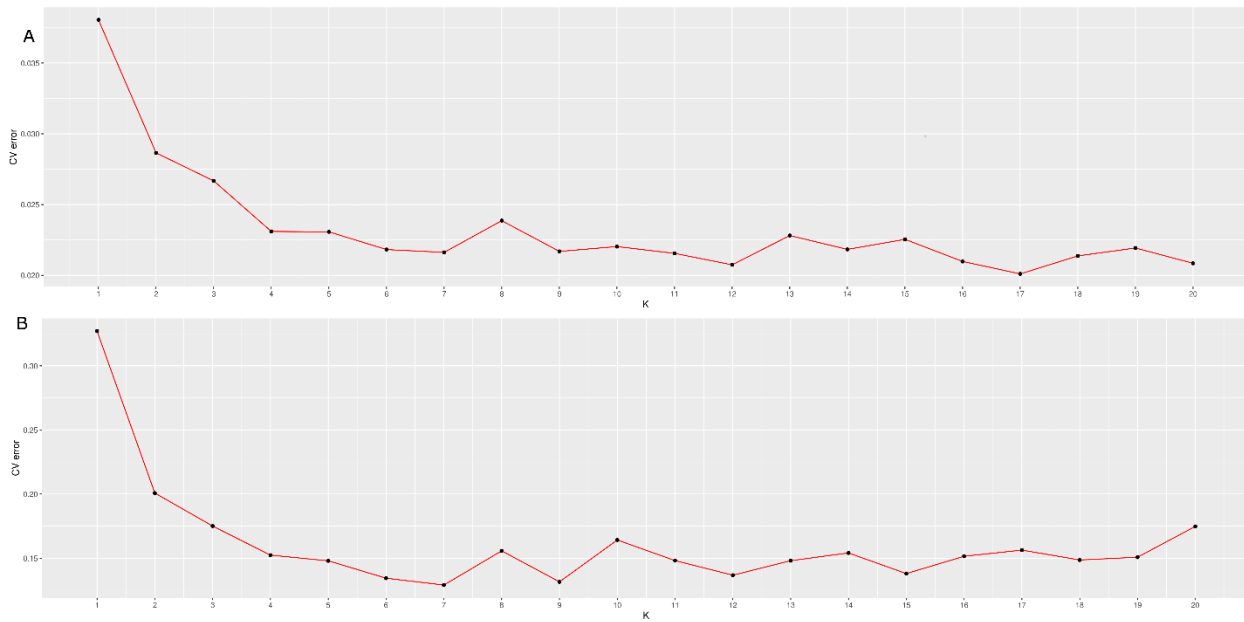

**Supplementary Figure S2. Trend of CV error in RAW and in variants filtered for  $MAF \geq 0.5\%$ .** The CV for the  $MAF > 0.5\%$  dataset comprised 72 variants shown.  $K = 7$  is the best fit (upon observing consistency in CV error between raw and  $MAF \geq 0.5\%$  at  $K=7$ , optimum number of clusters 7 was selected; the inconsistency observed in RAW from  $K=8$  may be resulting from  $MAF < 0.5\%$  variants), suggesting that 7 different SARS-CoV-2 strains existed in early transmission of SARS-CoV-2 across continents. (CV-cross validation procedure)

**LD block from combined dataset with  
MAF $\geq$ 0.5% set**

**North America**

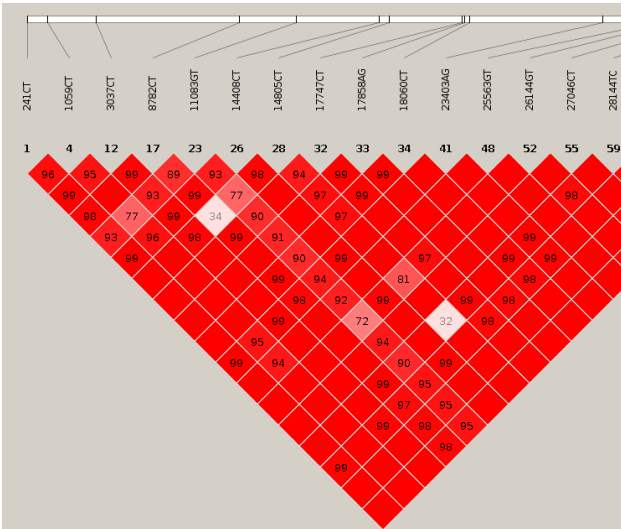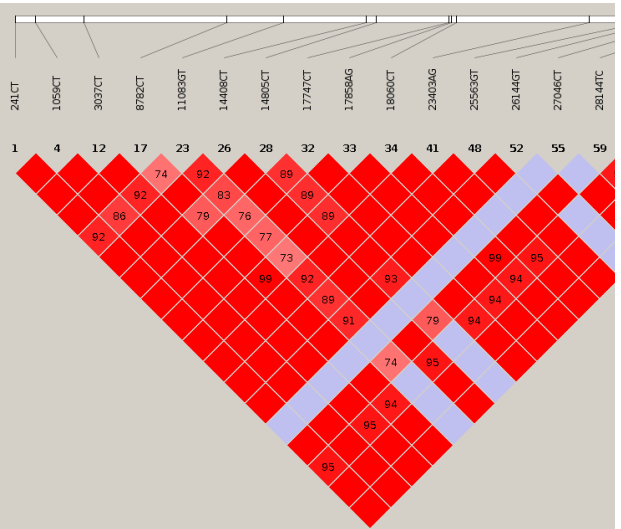

**South America**

**Oceania**

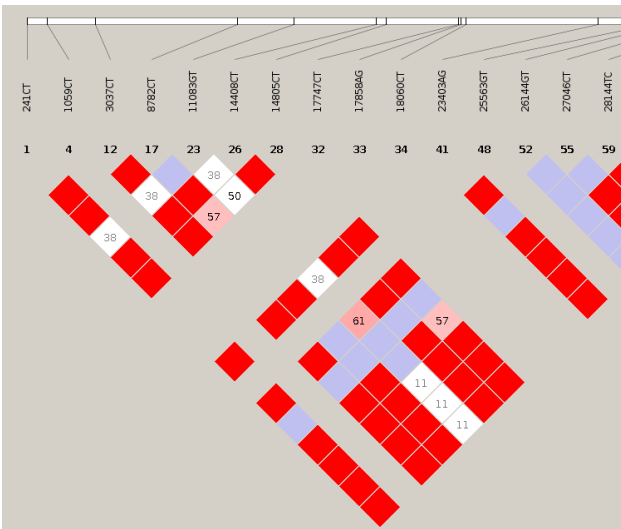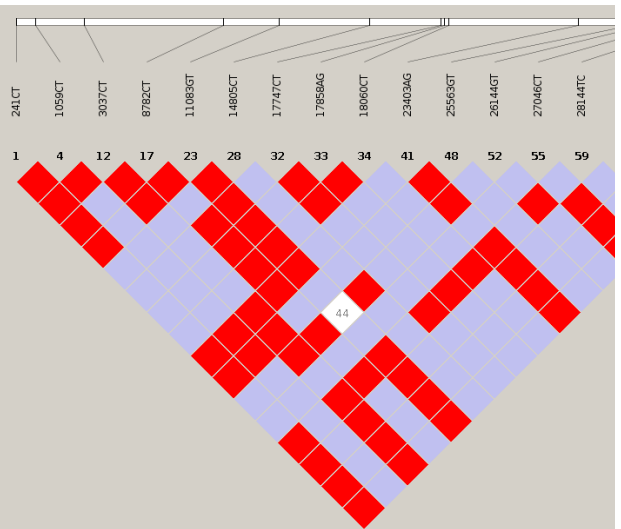

## Asia

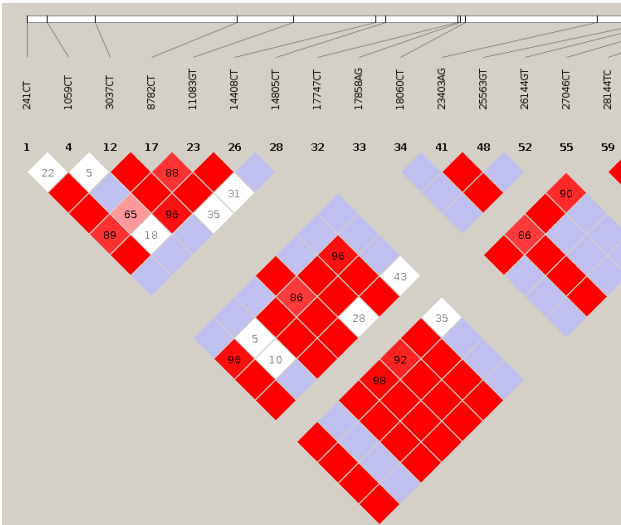

## Europe

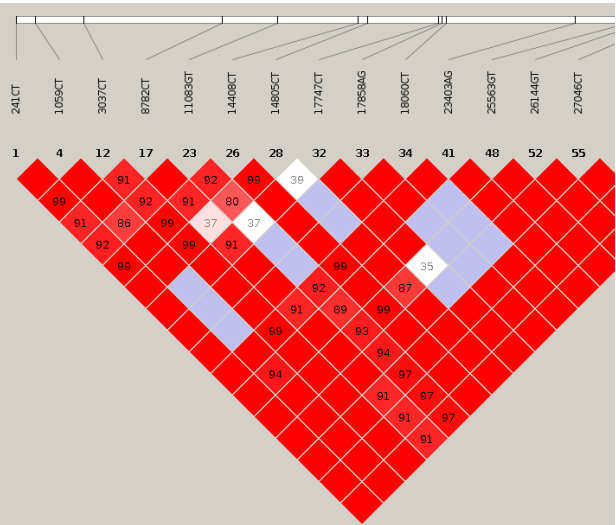

## Africa

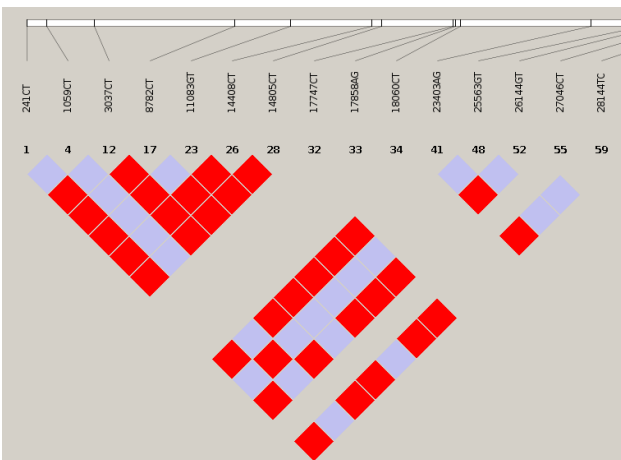

**Supplementary Figure S3. Linkage disequilibrium (LD) variation in haplotype block of combined dataset in each continental dataset.** Extent of LD variation observed in each continental dataset when haplotype block comprising the set of 18 variants identified in combined dataset were mapped to continental datasets.
